# Supplementary material for: Enhanced electrochemical response of activated carbon nanostructures from tree-bark biomass waste in polymer-gel active electrolytes
Source: Royal Society of Chemistry journal article supplement (doi:10.1039/c7ra05810a), 2017-01-01
Supplement: c7ra05810a1.pdf [file c7ra05810a1.pdf]

## Enhanced electrochemical response of activated carbon nanostructures from tree-bark biomass waste in polymer-gel active electrolytes

Damilola Momodu, Abdulhakeem Bello, Kabir Oyedotun, Faith Ochai-Ejeh, Julien Dangbegnon, Moshawe Madito and Ncholu Manyala\*

Department of Physics, Institute of Applied Materials, SARCHI Chair in Carbon Technology and Materials, University of Pretoria, Pretoria 0028, South Africa.

\*Corresponding author's email: [Ncholu.Manyala@up.ac.za](mailto:Ncholu.Manyala@up.ac.za).

Tel.: +(27)12 420 3549; Fax: +(27)12 420 2516

### Supporting Information

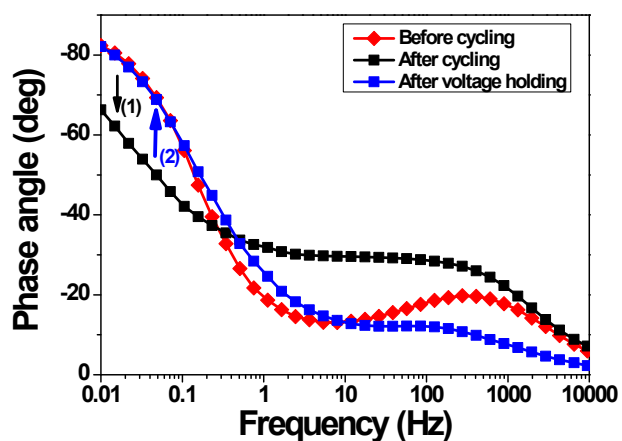

**Figure S1.** Combined Bode plot showing the pristine symmetric ACB cell, after cycling and after 120 h voltage holding
